# Supplementary material for: Functional classification and validation of yeast prenylation motifs using machine learning and genetic reporters
Source: PubMed Central journal article supplement (PMC9231725; doi:10.1371/journal.pone.0270128), 2022-06-24

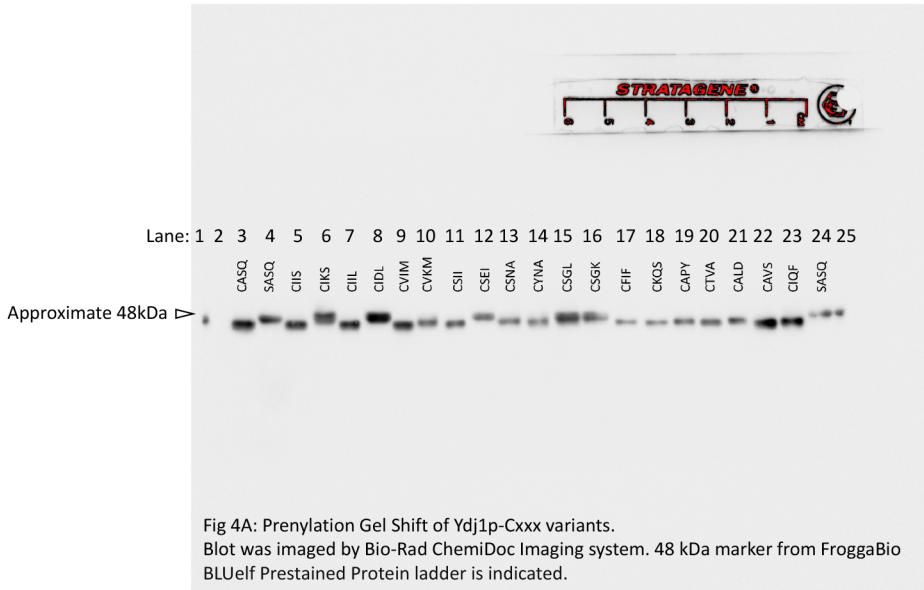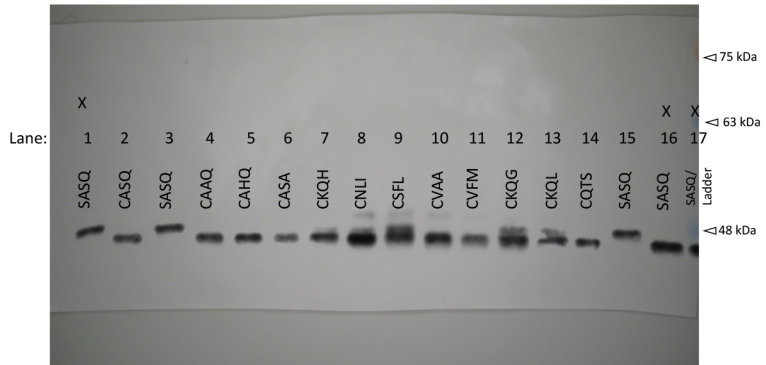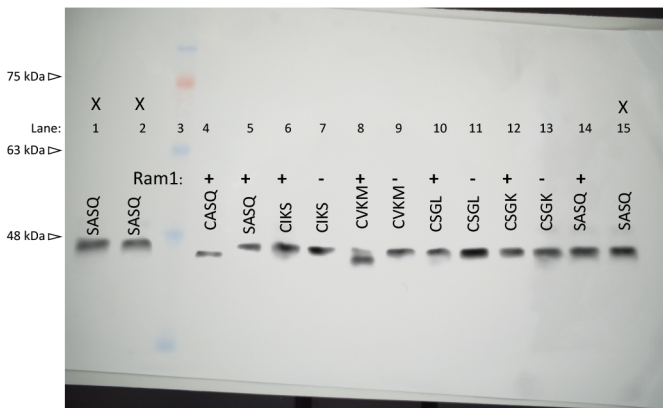

Supplement: pone.0270128.s010.pdf [file pone.0270128.s010.pdf]
